# Supplementary material for: Relationships Between Skeletal Muscle Mass, Lumbar Lordosis, and Chronic Low Back Pain in the Elderly
Source: PubMed Central journal article supplement — Neurospine. 2023 Sep 30;20(3):959–68. doi: 10.14245/ns.2346494.247 (PMC10562244; doi:10.14245/ns.2346494.247), 2023-09-30
Supplement: ns-2346494-247-Supplementary-Table-1.pdf [file ns-2346494-247-Supplementary-Table-1.pdf]

**Supplementary Table 1.** Characteristics of subjects under the age of 70

| Characteristic           | Men (n = 47)  |                  |         | Women (n = 52) |                  |         |
|--------------------------|---------------|------------------|---------|----------------|------------------|---------|
|                          | CLBP (n = 19) | Control (n = 28) | p-value | CLBP (n = 20)  | Control (n = 32) | p-value |
| Age (yr)                 | 67.2 ± 1.5    | 66.3 ± 1.3       | 0.044*  | 67.0 ± 1.6     | 67.1 ± 1.2       | 0.881   |
| Weight (kg)              | 68.7 ± 8.0    | 69.7 ± 7.6       | 0.662   | 55.4 ± 7.6     | 53.2 ± 6.5       | 0.268   |
| Height (cm)              | 167.2 ± 4.9   | 169.0 ± 4.9      | 0.195   | 154.8 ± 5.3    | 157.3 ± 5.3      | 0.092   |
| BMI (kg/m <sup>2</sup> ) | 24.6 ± 2.5    | 24.4 ± 2.4       | 0.798   | 23.1 ± 2.6     | 21.5 ± 2.5       | 0.033*  |
| LLA (°)                  | 29.4 ± 10.2   | 38.8 ± 8.7       | 0.002*  | 33.4 ± 11.3    | 38.6 ± 9.5       | 0.083   |
| MSMI (%)                 | 31.2 ± 2.0    | 32.3 ± 2.0       | 0.070   | 25.8 ± 1.9     | 27.5 ± 2.3       | 0.007*  |

Values are presented as mean ± standard deviation.

CLBP, chronic low back pain; BMI, body mass index; LLA, lumbar lordotic angle; MSMI, modified skeletal muscle mass index.

\*p < 0.05, statistically significant differences.
