# Supplementary material for: Relationships Between Skeletal Muscle Mass, Lumbar Lordosis, and Chronic Low Back Pain in the Elderly
Source: PubMed Central journal article supplement — Neurospine. 2023 Sep 30;20(3):959–68. doi: 10.14245/ns.2346494.247 (PMC10562244; doi:10.14245/ns.2346494.247), 2023-09-30
Supplement: ns-2346494-247-Supplementary-Table-2.pdf [file ns-2346494-247-Supplementary-Table-2.pdf]

**Supplementary Table 2.** Characteristics of subjects aged 70 or over

| Characteristic           | Men (n = 34)  |                  |         | Women (n = 32) |                  |         |
|--------------------------|---------------|------------------|---------|----------------|------------------|---------|
|                          | CLBP (n = 16) | Control (n = 18) | p-value | CLBP (n = 16)  | Control (n = 16) | p-value |
| Mean age (yr)            | 73.4 ± 3.0    | 74.6 ± 4.7       | 0.400   | 73.0 ± 2.3     | 71.7 ± 1.7       | 0.075   |
| Weight (kg)              | 64.9 ± 6.4    | 66.2 ± 7.1       | 0.572   | 53.8 ± 9.5     | 56.3 ± 6.6       | 0.396   |
| Height (cm)              | 167.4 ± 4.6   | 166.4 ± 4.5      | 0.529   | 153.9 ± 5.1    | 156.3 ± 4.1      | 0.156   |
| BMI (kg/m <sup>2</sup> ) | 23.1 ± 2.1    | 23.9 ± 2.0       | 0.312   | 22.7 ± 3.2     | 23.0 ± 2.1       | 0.699   |
| LLA (degree)             | 30.4 ± 11.3   | 34.5 ± 7.5       | 0.227   | 30.3 ± 11.2    | 37.4 ± 8.8       | 0.046*  |
| MSMI (%)                 | 31.1 ± 1.4    | 32.2 ± 1.9       | 0.056   | 26.4 ± 1.8     | 26.4 ± 1.7       | 0.924   |

Values are presented as mean ± standard deviation.

CLBP, chronic low back pain; BMI, body mass index; LLA, lumbar lordotic angle; MSMI, modified skeletal muscle mass index.

\*p < 0.05, statistically significant differences.
